# Supplementary material for: Microbial Risk Assessment of Industrial Ice Cream Marketed in Italy
Source: MDPI journal article supplement (doi:10.3390/app12041988), 2022-02-14
Supplement: s1 [file s1]

**Table S3: Microbiological results of the ice cream samples without inclusion**

Results of different microbiological parameters obtained for 81 samples of industrial ice cream sampled at different stores of the mass-market retailers in Italy. All the ice cream samples were milk-based and had no inclusions. See the specific ID in Table S1 for details about ice cream flavor. Analyzes were performed on 25 g of sample and the results are expressed as colony forming units (cfu)/g.

| ID  | Aerobic colonies enumeration | <i>Enterobacteriaceae</i> enumeration | Coagulase-positive Staphylococci enumeration | <i>Listeria monocytogenes</i> detection | <i>Listeria monocytogenes</i> enumeration | <i>Salmonella</i> spp. detection |
|-----|------------------------------|---------------------------------------|----------------------------------------------|-----------------------------------------|-------------------------------------------|----------------------------------|
| 7   | 50                           | < 10                                  | < 100                                        | Not detected                            | Not detected                              | Not detected                     |
| 14  | 470                          | 40                                    | < 100                                        | Not detected                            | Not detected                              | Not detected                     |
| 18  | 180                          | < 10                                  | < 100                                        | Not detected                            | Not detected                              | Not detected                     |
| 19  | 80                           | < 10                                  | < 100                                        | Not detected                            | Not detected                              | Not detected                     |
| 24  | 70                           | < 10                                  | < 100                                        | Not detected                            | Not detected                              | Not detected                     |
| 30  | 60                           | < 10                                  | < 100                                        | Not detected                            | Not detected                              | Not detected                     |
| 47  | 120                          | < 10                                  | < 100                                        | Not detected                            | Not detected                              | Not detected                     |
| 48  | 130                          | < 10                                  | < 100                                        | Not detected                            | Not detected                              | Not detected                     |
| 50  | 90                           | < 10                                  | < 100                                        | Not detected                            | Not detected                              | Not detected                     |
| 58  | 150                          | < 10                                  | < 100                                        | Not detected                            | Not detected                              | Not detected                     |
| 70  | 50                           | 20                                    | < 100                                        | Not detected                            | Not detected                              | Not detected                     |
| 79  | 110                          | < 10                                  | < 100                                        | Not detected                            | Not detected                              | Not detected                     |
| 80  | 150                          | < 10                                  | < 100                                        | Not detected                            | Not detected                              | Not detected                     |
| 82  | 30                           | < 10                                  | < 100                                        | Not detected                            | Not detected                              | Not detected                     |
| 84  | 280                          | < 10                                  | < 100                                        | Not detected                            | Not detected                              | Not detected                     |
| 87  | 190                          | < 10                                  | < 100                                        | Not detected                            | Not detected                              | Not detected                     |
| 89  | 360                          | 60                                    | 100                                          | Not detected                            | Not detected                              | Not detected                     |
| 92  | 110                          | < 10                                  | < 100                                        | Not detected                            | Not detected                              | Not detected                     |
| 94  | 220                          | < 10                                  | < 100                                        | Not detected                            | Not detected                              | Not detected                     |
| 95  | 50                           | < 10                                  | < 100                                        | Not detected                            | Not detected                              | Not detected                     |
| 97  | 360                          | < 10                                  | < 100                                        | Not detected                            | Not detected                              | Not detected                     |
| 98  | 110                          | < 10                                  | < 100                                        | Not detected                            | Not detected                              | Not detected                     |
| 101 | 40                           | < 10                                  | < 100                                        | Not detected                            | Not detected                              | Not detected                     |
| 103 | 150                          | < 10                                  | < 100                                        | Not detected                            | Not detected                              | Not detected                     |
| 104 | 220                          | 20                                    | < 100                                        | Not detected                            | Not detected                              | Not detected                     |
| 105 | 80                           | < 10                                  | < 100                                        | Not detected                            | Not detected                              | Not detected                     |

|     |     |      |       |              |              |              |
|-----|-----|------|-------|--------------|--------------|--------------|
| 107 | 20  | < 10 | < 100 | Not detected | Not detected | Not detected |
| 109 | 300 | 10   | < 100 | Not detected | Not detected | Not detected |
| 111 | 90  | < 10 | < 100 | Not detected | Not detected | Not detected |
| 112 | 190 | < 10 | < 100 | Not detected | Not detected | Not detected |
| 113 | 40  | < 10 | < 100 | Not detected | Not detected | Not detected |
| 114 | 400 | 10   | < 100 | Not detected | Not detected | Not detected |
| 115 | 290 | < 10 | < 100 | Not detected | Not detected | Not detected |
| 117 | 60  | < 10 | < 100 | Not detected | Not detected | Not detected |
| 120 | 20  | < 10 | < 100 | Not detected | Not detected | Not detected |
| 122 | 210 | < 10 | < 100 | Not detected | Not detected | Not detected |
| 124 | 310 | < 10 | < 100 | Not detected | Not detected | Not detected |
| 125 | 80  | < 10 | < 100 | Not detected | Not detected | Not detected |
| 127 | 60  | < 10 | < 100 | Not detected | Not detected | Not detected |
| 128 | 280 | 20   | < 100 | Not detected | Not detected | Not detected |
| 129 | 20  | < 10 | < 100 | Not detected | Not detected | Not detected |
| 130 | 40  | < 10 | < 100 | Not detected | Not detected | Not detected |
| 133 | 140 | < 10 | < 100 | Not detected | Not detected | Not detected |
| 134 | 70  | < 10 | < 100 | Not detected | Not detected | Not detected |
| 136 | 50  | < 10 | < 100 | Not detected | Not detected | Not detected |
| 137 | 490 | 40   | < 100 | Not detected | Not detected | Not detected |
| 138 | 50  | < 10 | < 100 | Not detected | Not detected | Not detected |
| 140 | 60  | < 10 | < 100 | Not detected | Not detected | Not detected |
| 141 | 150 | < 10 | < 100 | Not detected | Not detected | Not detected |
| 142 | 20  | < 10 | < 100 | Not detected | Not detected | Not detected |
| 143 | 130 | < 10 | < 100 | Not detected | Not detected | Not detected |
| 144 | 330 | 20   | < 100 | Not detected | Not detected | Not detected |
| 147 | 30  | < 10 | < 100 | Not detected | Not detected | Not detected |
| 149 | 90  | < 10 | < 100 | Not detected | Not detected | Not detected |
| 150 | 40  | < 10 | < 100 | Not detected | Not detected | Not detected |
| 151 | 120 | < 10 | < 100 | Not detected | Not detected | Not detected |
| 153 | 500 | 70   | < 100 | Not detected | Not detected | Not detected |
| 155 | 40  | < 10 | < 100 | Not detected | Not detected | Not detected |
| 157 | 420 | < 10 | < 100 | Not detected | Not detected | Not detected |
| 159 | 20  | < 10 | < 100 | Not detected | Not detected | Not detected |

|     |     |      |       |              |              |              |
|-----|-----|------|-------|--------------|--------------|--------------|
| 161 | 30  | < 10 | < 100 | Not detected | Not detected | Not detected |
| 162 | 110 | < 10 | < 100 | Not detected | Not detected | Not detected |
| 164 | 90  | < 10 | < 100 | Not detected | Not detected | Not detected |
| 168 | 190 | < 10 | < 100 | Not detected | Not detected | Not detected |
| 170 | 20  | < 10 | < 100 | Not detected | Not detected | Not detected |
| 171 | 200 | < 10 | < 100 | Not detected | Not detected | Not detected |
| 173 | 30  | < 10 | < 100 | Not detected | Not detected | Not detected |
| 174 | 210 | 50   | < 100 | Not detected | Not detected | Not detected |
| 175 | 140 | 30   | < 100 | Not detected | Not detected | Not detected |
| 176 | 50  | < 10 | < 100 | Not detected | Not detected | Not detected |
| 177 | 70  | < 10 | < 100 | Not detected | Not detected | Not detected |
| 179 | 180 | < 10 | < 100 | Not detected | Not detected | Not detected |
| 184 | 80  | < 10 | < 100 | Not detected | Not detected | Not detected |
| 187 | 140 | < 10 | < 100 | Not detected | Not detected | Not detected |
| 190 | 80  | < 10 | < 100 | Not detected | Not detected | Not detected |
| 192 | 280 | < 10 | < 100 | Not detected | Not detected | Not detected |
| 193 | 70  | < 10 | < 100 | Not detected | Not detected | Not detected |
| 195 | 460 | 80   | 200   | Not detected | Not detected | Not detected |
| 196 | 110 | 30   | < 100 | Not detected | Not detected | Not detected |
| 198 | 30  | < 10 | < 100 | Not detected | Not detected | Not detected |
| 200 | 150 | 10   | < 100 | Not detected | Not detected | Not detected |
