# Supplementary material for: Microbial Risk Assessment of Industrial Ice Cream Marketed in Italy
Source: MDPI journal article supplement (doi:10.3390/app12041988), 2022-02-14
Supplement: s1 [file s1]

**Table S2: Microbiological results of the ice cream samples with inclusion**

Results of different microbiological parameters obtained for 119 samples of industrial ice cream sampled at different stores of the mass-market retailers in Italy. All ice cream samples were milk-based and had at least one inclusion (toppings or decorations). See the specific ID in Table S1 for details about ice cream flavor and type of inclusion. Analyzes were performed on 25 g of sample and the results are expressed as colony forming units (cfu)/g.

| ID | Aerobic colonies enumeration | <i>Enterobacteriaceae</i> enumeration | Coagulase-positive Staphylococci enumeration | <i>Listeria monocytogenes</i> detection | <i>Listeria monocytogenes</i> enumeration | <i>Salmonella</i> spp. detection |
|----|------------------------------|---------------------------------------|----------------------------------------------|-----------------------------------------|-------------------------------------------|----------------------------------|
| 1  | 90                           | < 10                                  | < 100                                        | Not detected                            | Not detected                              | Not detected                     |
| 2  | 1620                         | 140                                   | < 100                                        | Not detected                            | Not detected                              | Not detected                     |
| 3  | 1200                         | 10                                    | < 100                                        | Detected                                | < 10                                      | Not detected                     |
| 4  | < 10                         | < 10                                  | < 100                                        | Not detected                            | Not detected                              | Not detected                     |
| 5  | 980                          | 10                                    | < 100                                        | Not detected                            | Not detected                              | Not detected                     |
| 6  | 1890                         | < 10                                  | < 100                                        | Not detected                            | Not detected                              | Not detected                     |
| 8  | 100                          | < 10                                  | < 100                                        | Not detected                            | Not detected                              | Not detected                     |
| 9  | 40                           | < 10                                  | < 100                                        | Detected                                | < 10                                      | Not detected                     |
| 10 | 20                           | < 10                                  | < 100                                        | Not detected                            | Not detected                              | Not detected                     |
| 11 | 20                           | < 10                                  | < 100                                        | Not detected                            | Not detected                              | Not detected                     |
| 12 | 510                          | < 10                                  | < 100                                        | Not detected                            | Not detected                              | Not detected                     |
| 13 | 80                           | < 10                                  | < 100                                        | Not detected                            | Not detected                              | Not detected                     |
| 15 | 640                          | 10                                    | < 100                                        | Detected                                | < 10                                      | Not detected                     |
| 16 | 140                          | < 10                                  | < 100                                        | Not detected                            | Not detected                              | Not detected                     |
| 17 | 70                           | < 10                                  | < 100                                        | Not detected                            | Not detected                              | Not detected                     |
| 20 | 300                          | < 10                                  | < 100                                        | Not detected                            | Not detected                              | Not detected                     |
| 21 | 480                          | < 10                                  | < 100                                        | Not detected                            | Not detected                              | Not detected                     |
| 22 | 60                           | < 10                                  | 100                                          | Not detected                            | Not detected                              | Not detected                     |
| 23 | 2600                         | < 10                                  | < 100                                        | Not detected                            | Not detected                              | Not detected                     |
| 25 | 150                          | < 10                                  | < 100                                        | Not detected                            | Not detected                              | Not detected                     |
| 26 | 4000                         | < 10                                  | < 100                                        | Not detected                            | Not detected                              | Not detected                     |
| 27 | 2000                         | < 10                                  | 100                                          | Not detected                            | Not detected                              | Not detected                     |
| 28 | 30                           | < 10                                  | < 100                                        | Not detected                            | Not detected                              | Not detected                     |
| 29 | 210                          | < 10                                  | < 100                                        | Not detected                            | Not detected                              | Not detected                     |
| 31 | 130                          | < 10                                  | < 100                                        | Not detected                            | Not detected                              | Not detected                     |
| 32 | 280                          | < 10                                  | < 100                                        | Not detected                            | Not detected                              | Not detected                     |

|    |        |       |       |              |              |              |
|----|--------|-------|-------|--------------|--------------|--------------|
| 33 | 710    | < 10  | < 100 | Not detected | Not detected | Not detected |
| 34 | 390    | < 10  | < 100 | Not detected | Not detected | Not detected |
| 35 | 30     | < 10  | < 100 | Not detected | Not detected | Not detected |
| 36 | 20     | < 10  | < 100 | Not detected | Not detected | Not detected |
| 37 | 270    | < 10  | < 100 | Not detected | Not detected | Not detected |
| 38 | 390    | < 10  | < 100 | Not detected | Not detected | Not detected |
| 39 | 600    | < 10  | < 100 | Not detected | Not detected | Not detected |
| 40 | 100    | < 10  | < 100 | Not detected | Not detected | Not detected |
| 41 | 100    | < 10  | < 100 | Not detected | Not detected | Not detected |
| 42 | 50     | < 10  | < 100 | Not detected | Not detected | Not detected |
| 43 | 230    | < 10  | < 100 | Not detected | Not detected | Not detected |
| 44 | 2120   | < 10  | < 100 | Not detected | Not detected | Not detected |
| 45 | 30     | < 10  | < 100 | Not detected | Not detected | Not detected |
| 46 | 100    | < 10  | < 100 | Not detected | Not detected | Not detected |
| 49 | 40     | < 10  | < 100 | Not detected | Not detected | Not detected |
| 51 | 110    | 10    | < 100 | Not detected | Not detected | Not detected |
| 52 | 9800   | 100   | 700   | Detected     | 20           | Not detected |
| 53 | 350000 | 16000 | < 100 | Not detected | Not detected | Not detected |
| 54 | 1300   | 30    | < 100 | Detected     | < 10         | Not detected |
| 55 | 860    | 40    | < 100 | Detected     | 70           | Not detected |
| 56 | 12000  | 230   | < 100 | Detected     | 110          | Not detected |
| 57 | 350    | 20    | < 100 | Detected     | < 10         | Not detected |
| 59 | 570    | < 10  | < 100 | Not detected | Not detected | Not detected |
| 60 | 420    | < 10  | < 100 | Detected     | 350          | Not detected |
| 61 | 30     | < 10  | < 100 | Not detected | Not detected | Not detected |
| 62 | 40     | < 10  | < 100 | Not detected | Not detected | Not detected |
| 63 | 100    | < 10  | < 100 | Not detected | Not detected | Not detected |
| 64 | 170    | < 10  | < 100 | Not detected | Not detected | Not detected |
| 65 | 190    | 80    | < 100 | Not detected | Not detected | Not detected |
| 66 | 40     | 10    | < 100 | Not detected | Not detected | Not detected |
| 67 | 46000  | 20    | < 100 | Not detected | Not detected | Not detected |
| 68 | 350    | 10    | < 100 | Not detected | Not detected | Not detected |
| 69 | 5000   | 4000  | < 100 | Not detected | Not detected | Not detected |
| 71 | 230    | 30    | < 100 | Not detected | Not detected | Not detected |

|     |        |      |       |              |              |              |
|-----|--------|------|-------|--------------|--------------|--------------|
| 72  | 230    | < 10 | < 100 | Not detected | Not detected | Not detected |
| 73  | 180    | < 10 | < 100 | Not detected | Not detected | Not detected |
| 74  | 330    | < 10 | < 100 | Not detected | Not detected | Not detected |
| 75  | 110    | < 10 | < 100 | Not detected | Not detected | Not detected |
| 76  | 260    | < 10 | < 100 | Not detected | Not detected | Not detected |
| 77  | 710000 | < 10 | < 100 | Not detected | Not detected | Not detected |
| 78  | 360    | < 10 | < 100 | Not detected | Not detected | Not detected |
| 81  | 50     | < 10 | < 100 | Not detected | Not detected | Not detected |
| 83  | 80     | < 10 | < 100 | Not detected | Not detected | Not detected |
| 85  | 450    | 10   | < 100 | Not detected | Not detected | Not detected |
| 86  | 70     | < 10 | < 100 | Not detected | Not detected | Not detected |
| 88  | 10000  | 20   | < 100 | Detected     | < 10         | Not detected |
| 90  | 20     | < 10 | < 100 | Not detected | Not detected | Not detected |
| 91  | 60     | < 10 | < 100 | Not detected | Not detected | Not detected |
| 93  | 620    | 10   | < 100 | Not detected | Not detected | Not detected |
| 96  | 30     | < 10 | < 100 | Not detected | Not detected | Not detected |
| 99  | 310    | < 10 | < 100 | Not detected | Not detected | Not detected |
| 100 | 50     | < 10 | < 100 | Not detected | Not detected | Not detected |
| 102 | 760    | < 10 | < 100 | Not detected | Not detected | Not detected |
| 106 | 330    | < 10 | < 100 | Not detected | Not detected | Not detected |
| 108 | 330000 | 440  | < 100 | Detected     | 30           | Not detected |
| 110 | 610    | < 10 | < 100 | Not detected | Not detected | Not detected |
| 116 | 880    | < 10 | < 100 | Not detected | Not detected | Not detected |
| 118 | 210    | < 10 | < 100 | Not detected | Not detected | Not detected |
| 119 | 320    | 20   | 100   | Not detected | Not detected | Not detected |
| 121 | 110    | < 10 | < 100 | Not detected | Not detected | Not detected |
| 123 | 20     | < 10 | < 100 | Not detected | Not detected | Not detected |
| 126 | 980    | < 10 | < 100 | Not detected | Not detected | Not detected |
| 131 | 40     | < 10 | < 100 | Not detected | Not detected | Not detected |
| 132 | 240    | < 10 | < 100 | Not detected | Not detected | Not detected |
| 135 | 4000   | < 10 | < 100 | Not detected | Not detected | Not detected |
| 139 | 680000 | 60   | < 100 | Detected     | 120          | Not detected |
| 145 | 30     | < 10 | < 100 | Not detected | Not detected | Not detected |
| 146 | 420    | < 10 | < 100 | Not detected | Not detected | Not detected |

|     |        |      |       |              |              |              |
|-----|--------|------|-------|--------------|--------------|--------------|
| 148 | 48000  | 50   | < 100 | Detected     | < 10         | Not detected |
| 152 | 290    | < 10 | < 100 | Not detected | Not detected | Not detected |
| 154 | 90     | < 10 | < 100 | Not detected | Not detected | Not detected |
| 156 | 20     | < 10 | < 100 | Not detected | Not detected | Not detected |
| 158 | 7000   | 110  | 300   | Not detected | Not detected | Not detected |
| 160 | 40     | < 10 | < 100 | Not detected | Not detected | Not detected |
| 163 | 130000 | 10   | 900   | Detected     | 10           | Not detected |
| 165 | 7400   | < 10 | < 100 | Not detected | Not detected | Not detected |
| 166 | 670    | < 10 | < 100 | Not detected | Not detected | Not detected |
| 167 | 150    | < 10 | < 100 | Not detected | Not detected | Not detected |
| 169 | 1000   | 90   | < 100 | Not detected | Not detected | Not detected |
| 172 | 2300   | < 10 | < 100 | Not detected | Not detected | Not detected |
| 178 | 90     | < 10 | < 100 | Not detected | Not detected | Not detected |
| 180 | 310    | < 10 | < 100 | Not detected | Not detected | Not detected |
| 181 | 180    | < 10 | < 100 | Not detected | Not detected | Not detected |
| 182 | 220000 | 220  | < 100 | Detected     | < 10         | Not detected |
| 183 | 480    | < 10 | < 100 | Not detected | Not detected | Not detected |
| 185 | 100    | < 10 | < 100 | Not detected | Not detected | Not detected |
| 186 | 200    | < 10 | < 100 | Not detected | Not detected | Not detected |
| 188 | 530    | 80   | < 100 | Not detected | Not detected | Not detected |
| 189 | 40     | < 10 | < 100 | Not detected | Not detected | Not detected |
| 191 | 120    | < 10 | < 100 | Not detected | Not detected | Not detected |
| 194 | 80     | < 10 | < 100 | Not detected | Not detected | Not detected |
| 197 | 38000  | 380  | < 100 | Detected     | < 10         | Not detected |
| 199 | 190    | < 10 | < 100 | Not detected | Not detected | Not detected |
