# Supplementary material for: Microbial Risk Assessment of Industrial Ice Cream Marketed in Italy
Source: MDPI journal article supplement (doi:10.3390/app12041988), 2022-02-14
Supplement: s1 [file s1]

**Table S1: Details of the ice cream samples**

Flavors and related inclusions (decorations or toppings) of 200 milk-based industrial ice creams in tub purchased at different stores of the mass-market retailers in Italy.

| ID | Flavor on the label         | Decoration                                         | Topping                | Flavor on the ingredient tag     | Country of production |
|----|-----------------------------|----------------------------------------------------|------------------------|----------------------------------|-----------------------|
| 1  | Apple Strudel               | Biscuit pieces                                     | Vanilla                | Custard<br>Vanilla               | Germany               |
| 2  | Salted pistachio            | Pistachio sprinkle                                 | Pistachio cream        | Pistachio                        | Italy                 |
| 3  | Hazelnut and gianduja       | Hazelnuts<br>Hazelnut sprinkle<br>Chocolate flakes | Gianduja               | Hazelnut<br>Gianduja             | Italy                 |
| 4  | Cassata                     | Candied fruit<br>Chocolate sprinkle                | None                   | Ricotta                          | Italy                 |
| 5  | Marsala cream and pistachio | Strawberries<br>Pistachio sprinkle                 | Strawberry<br>Gianduja | Marsala custard<br>Pistachio     | Italy                 |
| 6  | Pistachio and gianduja      | Pistachio sprinkle<br>Hazelnut sprinkle            | Gianduja               | Pistachio<br>Gianduja            | Italy                 |
| 7  | Milk cream                  | None                                               | None                   | Cream                            | Italy                 |
| 8  | Panna cotta                 | Almond sprinkle                                    | Caramel                | Cream                            | Italy                 |
| 9  | Triple chocolate            | Chocolate flakes                                   | White chocolate        | Dark chocolate<br>Milk chocolate | Italy                 |
| 10 | Black forest                | Candied cherries<br>Chocolate flakes               | Cherry                 | Dark chocolate<br>Vanilla        | Germany               |
| 11 | Tiramisù                    | Biscuit pieces<br>Coffee grains<br>Cocoa powder    | None                   | Mascarpone with egg yolk         | Germany               |
| 12 | Almond                      | Almond sprinkle                                    | None                   | Almond                           | Italy                 |
| 13 | Hazelnut                    | Hazelnut sprinkle                                  | None                   | Hazelnut                         | Italy                 |
| 14 | Vanilla                     | None                                               | None                   | Vanilla                          | Italy                 |
| 15 | Mint and chocolate          | Chocolate flakes                                   | None                   | Mint                             | Italy                 |
| 16 | Stracciatella               | Chocolate sprinkle                                 | None                   | Vanilla                          | Germany               |
| 17 | Hazelnut                    | Hazelnut sprinkle                                  | Dark chocolate         | Hazelnut                         | Germany               |
| 18 | Hazelnut                    | None                                               | None                   | Hazelnut                         | Italy                 |
| 19 | Crème and chocolate         | None                                               | None                   | Chocolate cream                  | Italy                 |

|    |                         |                                                                |                           |                       |         |
|----|-------------------------|----------------------------------------------------------------|---------------------------|-----------------------|---------|
| 20 | Spagnola                | Candied cherries                                               | Cherry                    | Cream<br>Vanilla      | Italy   |
| 21 | Pistachio               | Pistachio sprinkle                                             | None                      | Pistachio             | Italy   |
| 22 | Lemon                   | None                                                           | Lemon                     | Lemon                 | Italy   |
| 23 | Cream                   | Biscuit pieces                                                 | Amaretto                  | Cream                 | Italy   |
| 24 | Strawberry and lemon    | None                                                           | None                      | Strawberry<br>Lemon   | Italy   |
| 25 | Stracciatella           | Chocolate sprinkle                                             | Dark chocolate            | Vanilla               | Italy   |
| 26 | Mascarpone              | Pistachio sprinkle                                             | Forest Fruit              | Mascarpone            | Germany |
| 27 | Walnut                  | Caramelized walnuts sprinkle                                   | None                      | Walnut                | Italy   |
| 28 | Sour cherry ripple      | Candied black cherries                                         | Black cherry              | Vanilla               | Italy   |
| 29 | Low-fat cocoa drowned   | Chocolate flakes<br>Chocolate sprinkle                         | Dark chocolate            | Vanilla               | Italy   |
| 30 | Custard and chocolate   | None                                                           | None                      | Custard<br>Chocolate  | Italy   |
| 31 | Coffee cream            | Coffee grains                                                  | Nougat                    | Coffee                | Italy   |
| 32 | Chocolate               | Chocolate flakes                                               | None                      | Chocolate             | Italy   |
| 33 | Variegated black cherry | Biscuit pieces<br>Chocolate sprinkle<br>Candied black cherries | Black cherry              | Vanilla               | Italy   |
| 34 | Vanilla and pistachio   | Pistachio sprinkle                                             | Pistachio                 | Vanilla               | Italy   |
| 35 | Vanilla and almonds     | Candied almond sprinkle                                        | None                      | Vanilla               | Italy   |
| 36 | Stracciatella           | Chocolate sprinkle                                             | None                      | Cream                 | Italy   |
| 37 | Hazelnut                | Hazelnut sprinkles                                             | Low fat cocoa<br>Hazelnut | Hazelnut              | Italy   |
| 38 | Hazelnut and chocolate  | Chocolate sprinkles                                            | None                      | Hazelnut<br>Chocolate | Italy   |
| 39 | Coffee drowned          | Coffee grains<br>Cocoa powder                                  | Coffee                    | Vanilla               | Italy   |
| 40 | Variegated coffee       | Coffee grains                                                  | Coffee                    | Vanilla               | Italy   |
| 41 | Dark chocolate          | Chocolate sprinkle                                             | None                      | Chocolate             | Italy   |
| 42 | Stracciatella           | Chocolate sprinkle                                             | None                      | Vanilla               | Italy   |
| 43 | Chocolate drowned       | Chocolate sprinkle                                             | Dark Chocolate            | Cream<br>Vanilla      | Italy   |

|    |                         |                                                |                |                                                     |       |
|----|-------------------------|------------------------------------------------|----------------|-----------------------------------------------------|-------|
| 44 | Pistachio               | Pistachio sprinkle                             | None           | Pistachio                                           | Italy |
| 45 | Tiramisù                | Sponge cakes pieces<br>Coffee<br>Cocoa powder1 | Milk Chocolate | Tiramisu taste                                      | Italy |
| 46 | Truffle ice cream       | Hazelnut sprinkle<br>Chocolate sprinkle        | None           | Cocoa                                               | Italy |
| 47 | Cocoa cream             | None                                           | None           | Custard<br>Cocoa                                    | Italy |
| 48 | Cream                   | None                                           | None           | Cream                                               | Italy |
| 49 | Strawberry drowned      | Meringues                                      | Strawberry     | Strawberry<br>Vanilla                               | Italy |
| 50 | Coffee                  | None                                           | None           | Coffee                                              | Italy |
| 51 | Triple chocolate        | Chocolate flakes<br>Chocolate sprinkles        | Dark chocolate | Dark chocolate<br>Milk chocolate<br>White chocolate | Italy |
| 52 | Cream and hazelnut      | Hazelnut sprinkles                             | Dark chocolate | Cream<br>Hazelnut                                   | Italy |
| 53 | Cannoli                 | Waffle pieces<br>Chocolate sprinkles           | None           | Ricotta                                             | Italy |
| 54 | Cream and strawberry    | None                                           | Strawberry     | Cream<br>Strawberry                                 | Italy |
| 55 | Whisky and coffee       | Coffee grains                                  | Coffee         | Coffee                                              | Italy |
| 56 | Variegated chocolate    | Chocolate flakes<br>Chocolate grains           | Chocolate      | Chocolate                                           | Italy |
| 57 | Variegated black cherry | Chocolate sprinkle<br>Candied black cherries   | Black cherry   | Vanilla                                             | Italy |
| 58 | Yogurt                  | None                                           | None           | Yogurt                                              | Italy |
| 59 | Caramel                 | Biscuit pieces                                 | Caramel        | Vanilla                                             | Italy |
| 60 | Triple chocolate        | Chocolate flakes<br>Chocolate sprinkles        | Dark chocolate | Dark chocolate<br>Milk chocolate<br>White chocolate | Italy |
| 61 | Chocolate               | Chocolate biscuit pieces                       | None           | Chocolate                                           | Italy |
| 62 | Vanilla                 | Chocolate biscuit pieces                       | None           | Vanilla                                             | Italy |
| 63 | Nuts                    | Walnut sprinkles                               | None           | Walnut                                              | Italy |

|    |                        |                                                 |                |                                                     |       |
|----|------------------------|-------------------------------------------------|----------------|-----------------------------------------------------|-------|
| 64 | Variegated hazelnut    | Hazelnut sprinkles                              | Hazelnut       | Hazelnut                                            | Italy |
| 65 | Custard                | Biscuit pieces                                  | None           | Custard                                             | Italy |
| 66 | Pistachio and gianduja | Pistachio sprinkle<br>Hazelnut sprinkle         | Gianduja       | Pistachio<br>Gianduja                               | Italy |
| 67 | Cassata                | Candied fruit<br>Sponge cakes pieces            | None           | Ricotta                                             | Italy |
| 68 | Tiramisù               | Biscuit pieces<br>Coffee grains<br>Cocoa powder | None           | Mascarpone with egg yolk                            | Italy |
| 69 | Bacio                  | Hazelnuts                                       | Dark chocolate | Cocoa<br>Hazelnut                                   | Italy |
| 70 | Licorice               | None                                            | None           | Cream                                               | Italy |
| 71 | Stracciatella          | Chocolate sprinkle                              | None           | Vanilla                                             | Italy |
| 72 | Spagnola               | Candied cherries                                | Cherry         | Cream<br>Vanilla                                    | Italy |
| 73 | Variegated coffee      | Coffee grains                                   | Coffee         | Coffee                                              | Italy |
| 74 | Panna cotta            | Almond sprinkle                                 | Caramel        | Cream                                               | Italy |
| 75 | Triple chocolate       | Chocolate flakes                                | Dark chocolate | Dark chocolate<br>Milk chocolate<br>White chocolate | Italy |
| 76 | Cookie                 | Biscuit pieces<br>Chocolate sprinkles           | Oats           | Vanilla                                             | Italy |
| 77 | Caramelized yogurt     | None                                            | Caramel        | Yogurt                                              | Italy |
| 78 | Hazelnut               | Hazelnut sprinkle                               | Dark chocolate | Hazelnut                                            | Italy |
| 79 | Yogurt                 | None                                            | None           | Yogurt                                              | Italy |
| 80 | Pistachio              | None                                            | None           | Pistachio                                           | Italy |
| 81 | Chocolate drowned      | Milk chocolate flakes                           | Milk chocolate | Vanilla                                             | Italy |
| 82 | Yogurt                 | None                                            | None           | Yogurt                                              | Italy |
| 83 | Sour cherry ripple     | Candied black cherries                          | Black cherry   | Vanilla                                             | Italy |
| 84 | White chocolate        | None                                            | None           | Chocolate                                           | Italy |
| 85 | Coffee drowned         | Coffee grains<br>Cocoa powder                   | Coffee         | Vanilla                                             | Italy |
| 86 | Pistachio drowned      | White chocolate flakes                          | Pistachio      | Vanilla                                             | Italy |
| 87 | Hazelnut               | None                                            | None           | Hazelnut                                            | Italy |

|     |                        |                               |                   |                                  |       |
|-----|------------------------|-------------------------------|-------------------|----------------------------------|-------|
| 88  | Chocolate with cashews | Cashew sprinkles              | Chocolate Caramel | Chocolate                        | Italy |
| 89  | Milk chocolate         | None                          | None              | Chocolate                        | Italy |
| 90  | Hazelnut               | Hazelnut sprinkle             | Dark chocolate    | Hazelnut                         | Italy |
| 91  | Triple chocolate       | Chocolate flakes              | White chocolate   | Dark chocolate<br>Milk chocolate | Italy |
| 92  | Hazelnut               | None                          | None              | Hazelnut                         | Italy |
| 93  | Sour cherry ripple     | Candied black cherries        | Black cherry      | Vanilla                          | Italy |
| 94  | Pistachio              | None                          | None              | Pistachio                        | Italy |
| 95  | Chocolate              | None                          | None              | Chocolate                        | Italy |
| 96  | Coffee drowned         | Coffee grains<br>Cocoa powder | Coffee            | Vanilla                          | Italy |
| 97  | Milk cream             | None                          | None              | Cream                            | Italy |
| 98  | Vanilla                | None                          | None              | Vanilla                          | Italy |
| 99  | Vanilla and pistachio  | Pistachio sprinkle            | Pistachio         | Vanilla                          | Italy |
| 100 | Hazelnut               | Hazelnut sprinkle             | Dark chocolate    | Hazelnut                         | Italy |
| 101 | Hazelnut               | None                          | None              | Hazelnut                         | Italy |
| 102 | Triple chocolate       | Chocolate flakes              | White chocolate   | Dark chocolate<br>Milk chocolate | Italy |
| 103 | Yogurt                 | None                          | None              | Yogurt                           | Italy |
| 104 | Vanilla                | None                          | None              | Vanilla                          | Italy |
| 105 | Coffee                 | None                          | None              | Coffee                           | Italy |
| 106 | Coffee drowned         | Coffee grains<br>Cocoa powder | Coffee            | Vanilla                          | Italy |
| 107 | Custard                | None                          | None              | Custard                          | Italy |
| 108 | Chocolate drowned      | Milk chocolate flakes         | Milk chocolate    | Vanilla                          | Italy |
| 109 | Custard                | None                          | None              | Custard                          | Italy |
| 110 | Sour cherry ripple     | Candied black cherries        | Black cherry      | Vanilla                          | Italy |
| 111 | Coffee                 | None                          | None              | Coffee                           | Italy |
| 112 | Chocolate              | None                          | None              | Chocolate                        | Italy |
| 113 | Hazelnut               | None                          | None              | Hazelnut                         | Italy |
| 114 | Vanilla                | None                          | None              | Vanilla                          | Italy |
| 115 | Almond                 | None                          | None              | Almond                           | Italy |
| 116 | Spagnola               | Candied cherries              | Cherry            | Cream                            | Italy |

|     |                        |                               |                      |           |       |
|-----|------------------------|-------------------------------|----------------------|-----------|-------|
|     |                        |                               |                      | Vanilla   |       |
| 117 | Coffee                 | None                          | None                 | Coffee    | Italy |
| 118 | Vanilla and pistachio  | Pistachio sprinkle            | Pistachio            | Vanilla   | Italy |
| 119 | Hazelnut               | Hazelnut sprinkle             | Dark chocolate       | Hazelnut  | Italy |
| 120 | Vanilla                | None                          | None                 | Vanilla   | Italy |
| 121 | Sour cherry ripple     | Candied black cherries        | Black cherry         | Vanilla   | Italy |
| 122 | Pistachio              | None                          | None                 | Pistachio | Italy |
| 123 | Chocolate with cashews | Cashew sprinkles              | Chocolate<br>Caramel | Chocolate | Italy |
| 124 | Hazelnut               | None                          | None                 | Hazelnut  | Italy |
| 125 | Zabaione               | None                          | None                 | Zabaione  | Italy |
| 126 | Sour cherry ripple     | Candied black cherries        | Black cherry         | Vanilla   | Italy |
| 127 | Coffee                 | None                          | None                 | Coffee    | Italy |
| 128 | Pistachio              | None                          | None                 | Pistachio | Italy |
| 129 | Hazelnut               | None                          | None                 | Hazelnut  | Italy |
| 130 | Vanilla                | None                          | None                 | Vanilla   | Italy |
| 131 | Coffee drowned         | Coffee grains<br>Cocoa powder | Coffee               | Vanilla   | Italy |
| 132 | Chocolate drowned      | Milk chocolate flakes         | Milk chocolate       | Vanilla   | Italy |
| 133 | Coffee                 | None                          | None                 | Coffee    | Italy |
| 134 | Yogurt                 | None                          | None                 | Yogurt    | Italy |
| 135 | Hazelnut               | Hazelnut sprinkle             | Dark chocolate       | Hazelnut  | Italy |
| 136 | Almond                 | None                          | None                 | Almond    | Italy |
| 137 | Pistachio              | None                          | None                 | Pistachio | Italy |
| 138 | Mint                   | None                          | None                 | Mint      | Italy |
| 139 | Sour cherry ripple     | Candied black cherries        | Black cherry         | Vanilla   | Italy |
| 140 | Chocolate              | None                          | None                 | Chocolate | Italy |
| 141 | Hazelnut               | None                          | None                 | Hazelnut  | Italy |
| 142 | Vanilla                | None                          | None                 | Vanilla   | Italy |
| 143 | Almond                 | None                          | None                 | Almond    | Italy |
| 144 | White chocolate        | None                          | None                 | Chocolate | Italy |
| 145 | Hazelnut               | Hazelnut sprinkle             | Dark chocolate       | Hazelnut  | Italy |
| 146 | Pistachio drowned      | White chocolate flakes        | Pistachio            | Vanilla   | Italy |
| 147 | Coffee                 | None                          | None                 | Coffee    | Italy |

|     |                        |                                         |                 |                                  |         |
|-----|------------------------|-----------------------------------------|-----------------|----------------------------------|---------|
| 148 | Coffee drowned         | Coffee grains<br>Cocoa powder           | Coffee          | Vanilla                          | Germany |
| 149 | Almond                 | None                                    | None            | Almond                           | Italy   |
| 150 | Vanilla                | None                                    | None            | Vanilla                          | Italy   |
| 151 | Pistachio              | None                                    | None            | Pistachio                        | Italy   |
| 152 | Hazelnut               | Hazelnut sprinkle                       | Dark chocolate  | Hazelnut                         | Italy   |
| 153 | Hazelnut               | None                                    | None            | Hazelnut                         | Italy   |
| 154 | Chocolate drowned      | Milk chocolate flakes                   | Milk chocolate  | Vanilla                          | Italy   |
| 155 | Almond                 | None                                    | None            | Almond                           | Italy   |
| 156 | Pistachio drowned      | White chocolate flakes                  | Pistachio       | Vanilla                          | Italy   |
| 157 | Coffee                 | None                                    | None            | Coffee                           | Italy   |
| 158 | Sour cherry ripple     | Candied black cherries                  | Black cherry    | Vanilla                          | Italy   |
| 159 | Hazelnut               | None                                    | None            | Hazelnut                         | Italy   |
| 160 | Coffee drowned         | Coffee grains<br>Cocoa powder           | Coffee          | Vanilla                          | Italy   |
| 161 | Vanilla                | None                                    | None            | Vanilla                          | Italy   |
| 162 | Yogurt                 | None                                    | None            | Yogurt                           | Italy   |
| 163 | Triple chocolate       | Chocolate flakes                        | White chocolate | Dark chocolate<br>Milk chocolate | Italy   |
| 164 | Coffee                 | None                                    | None            | Coffee                           | Italy   |
| 165 | Sour cherry ripple     | Candied black cherries                  | Black cherry    | Vanilla                          | Italy   |
| 166 | Pistachio and gianduja | Pistachio sprinkle<br>Hazelnut sprinkle | Gianduja        | Pistachio<br>Gianduja            | Italy   |
| 167 | Spagnola               | Candied cherries                        | Cherry          | Cream<br>Vanilla                 | Italy   |
| 168 | Pistachio              | None                                    | None            | Pistachio                        | Italy   |
| 169 | Hazelnut               | Hazelnut sprinkle                       | Dark chocolate  | Hazelnut                         | Italy   |
| 170 | Coffee                 | None                                    | None            | Coffee                           | Italy   |
| 171 | Almond                 | None                                    | None            | Almond                           | Italy   |
| 172 | Pistachio and gianduja | Pistachio sprinkle<br>Hazelnut sprinkle | Gianduja        | Pistachio<br>Gianduja            | Germany |
| 173 | Dark chocolate         | None                                    | None            | Dark chocolate                   | Italy   |
| 174 | Chocolate              | None                                    | None            | Chocolate                        | Italy   |
| 175 | Chocolate              | None                                    | None            | Chocolate                        | Italy   |

|     |                        |                                         |                |                       |         |
|-----|------------------------|-----------------------------------------|----------------|-----------------------|---------|
| 176 | Yogurt                 | None                                    | None           | Yogurt                | Italy   |
| 177 | Pistachio              | None                                    | None           | Pistachio             | Italy   |
| 178 | Caramel                | Biscuit pieces                          | Caramel        | Vanilla               | Italy   |
| 179 | Vanilla                | None                                    | None           | Vanilla               | Italy   |
| 180 | Panna cotta            | Almond sprinkle                         | Caramel        | Cream                 | Germany |
| 181 | Sour cherry ripple     | Candied black cherries                  | Black cherry   | Vanilla               | Italy   |
| 182 | Pistachio and gianduja | Pistachio sprinkle<br>Hazelnut sprinkle | Gianduja       | Pistachio<br>Gianduja | Italy   |
| 183 | Spagnola               | Candied cherries                        | Cherry         | Cream<br>Vanilla      | Italy   |
| 184 | Hazelnut               | None                                    | None           | Hazelnut              | Italy   |
| 185 | Caramel                | Biscuit pieces                          | Caramel        | Vanilla               | Italy   |
| 186 | Chocolate drowned      | Milk chocolate flakes                   | Milk chocolate | Vanilla               | Italy   |
| 187 | Yogurt                 | None                                    | None           | Yogurt                | Italy   |
| 188 | Pistachio drowned      | White chocolate flakes                  | Pistachio      | Vanilla               | Italy   |
| 189 | Hazelnut               | Hazelnut sprinkle                       | Dark chocolate | Hazelnut              | Italy   |
| 190 | Pistachio              | None                                    | None           | Pistachio             | Italy   |
| 191 | Coffee drowned         | Coffee grains<br>Cocoa powder           | Coffee         | Vanilla               | Italy   |
| 192 | Milk cream             | None                                    | None           | Milk cream            | Italy   |
| 193 | Yogurt                 | None                                    | None           | Yogurt                | Italy   |
| 194 | Coffee drowned         | Coffee grains<br>Cocoa powder           | Coffee         | Vanilla               | Italy   |
| 195 | Dark chocolate         | None                                    | None           | Chocolate             | Italy   |
| 196 | White chocolate        | None                                    | None           | Chocolate             | Italy   |
| 197 | Sour cherry ripple     | Candied black cherries                  | Black cherry   | Vanilla               | Italy   |
| 198 | Chocolate              | None                                    | None           | Chocolate             | Italy   |
| 199 | Hazelnut               | Hazelnut sprinkle                       | Dark chocolate | Hazelnut              | Italy   |
| 200 | Chocolate              | None                                    | None           | Chocolate             | Italy   |
